# Supplementary material
Source: MDPI journal article supplement (https://www.mdpi.com/2410-3888/8/8/398)
Supplement: s1 [file s1]

# Supplementary Materials:

**Table S1.** Tagged Atlantic goliath grouper (*Epinephelus itajara*) demographic and summarized detection information, including: sex as evaluated in the field and/or determined via histological examination (“hist”) of gonad samples (female “F”; immature = “I”; male = “M”; transitional = “T”; undetermined = “U”); length at first capture (cm TL); age as determined from ageing of the dorsal spine; tag date; date of last detection; days at large (“DAL”); days detected (“Days”) across the two detection time series, 2010-2014 and 2015-2020.

| Fish # | Sex (field) | Sex (hist) | Length | Age | Tag site    | Tag date | Last detected | DAL  | Days<br>(2010-2014) | Days<br>(2015-2020) |
|--------|-------------|------------|--------|-----|-------------|----------|---------------|------|---------------------|---------------------|
| 24     | F           | F          | 153    | 8   | Zion Train  | 9/4/2010 | 4/16/2011     | 224  | 190                 | 0                   |
| 25     | M           | M          | 151    | 7   | Zion Train  | 9/4/2010 | 11/9/2013     | 1162 | 1553                | 0                   |
| 27     | M           | M          | 156    | 7   | Zion Train  | 9/4/2010 | 6/30/2013     | 1030 | 884                 | 0                   |
| 28     | F           | F          | 136    | 6   | Zion Train  | 9/4/2010 | 12/20/2014    | 1568 | 783                 | 0                   |
| 29     | M           | M          | 190    | 10  | Zion Train  | 9/4/2010 | 12/23/2012    | 841  | 750                 | 0                   |
| 30     | F           | F          | 136    | 6   | Three Holes | 9/5/2010 | 10/31/2010    | 56   | 55                  | 0                   |
| 31     | M           | T          | 127    | 5   | Three Holes | 9/5/2010 | 5/5/2014      | 1338 | 1314                | 0                   |
| 32     | F           | F          | 125    | 6   | Three Holes | 9/5/2010 | 7/3/2013      | 1032 | 75                  | 0                   |
| 33     | F           | F          | 163    | 9   | Gulfland    | 9/5/2010 | 9/20/2012     | 746  | 128                 | 0                   |
| 34     | F           | F          | 162    | 7   | Gulfland    | 9/5/2010 | 8/23/2013     | 1083 | 408                 | 0                   |
| 35     | F           | F          | 167    | 7   | Gulfland    | 9/5/2010 | 2/20/2014     | 1264 | 819                 | 0                   |
| 37     | M           | M          | 147    | 8   | Gulfland    | 9/5/2010 | 7/27/2013     | 1056 | 128                 | 0                   |
| 38     | F           | T          | 150    | 7   | Gulfland    | 9/5/2010 | 11/14/2010    | 70   | 71                  | 0                   |
| 39     | M           | M          | 135    | 6   | Gulfland    | 9/5/2010 | 9/22/2011     | 382  | 388                 | 0                   |
| 40     | M           | M          | 136    | 6   | Gulfland    | 9/5/2010 | 10/3/2012     | 759  | 499                 | 0                   |
| 41     | IMM         | IMM        | 117    | 5   | Gulfland    | 9/5/2010 | 3/8/2013      | 915  | 1110                | 0                   |
| 42     | IMM         | IMM        | 104    | 4   | Gulfland    | 9/5/2010 | 9/15/2018     | 2932 | 1104                | 125                 |
| 43     | IMM         | IMM        | 120    | 5   | Gulfland    | 9/5/2010 | 12/15/2012    | 832  | 750                 | 0                   |

|     |    |   |     |    |             |            |            |      |      |     |
|-----|----|---|-----|----|-------------|------------|------------|------|------|-----|
| 44  | M  | M | 137 | 8  | Zion Train  | 9/25/2010  | 12/15/2013 | 1177 | 408  | 0   |
| 45  | F  | F | 189 | 13 | Zion Train  | 9/25/2010  | 7/18/2013  | 1027 | 278  | 0   |
| 46  | F  | F | 179 | 10 | Zion Train  | 9/25/2010  | 9/19/2013  | 1090 | 89   | 0   |
| 48  | M  | M | 172 | 10 | Zion Train  | 9/25/2010  | 6/28/2013  | 1007 | 1006 | 0   |
| 49  | M  | M | 178 | 11 | Zion Train  | 9/25/2010  | 1/29/2014  | 1222 | 516  | 0   |
| 51  | F  | F | 130 | 6  | Zion Train  | 9/25/2010  | 9/4/2013   | 1075 | 187  | 0   |
| 52  | M  | T | 205 | 14 | Zion Train  | 9/25/2010  | 5/26/2013  | 974  | 931  | 0   |
| 53  | M  | M | 189 | 14 | Zion Train  | 9/26/2010  | 4/6/2019   | 3114 | 1257 | 538 |
| 55  | F  | F | 174 | 12 | Zion Train  | 9/26/2010  | 12/16/2015 | 1907 | 315  | 317 |
| 57  | M  | M | 181 | 10 | Zion Train  | 9/26/2010  | 9/2/2012   | 707  | 616  | 0   |
| 58  | F  | F | 180 | 10 | Zion Train  | 9/26/2010  | 10/2/2013  | 1102 | 103  | 0   |
| 59  | M  | T | 182 | 11 | Zion Train  | 9/26/2010  | 7/19/2014  | 1392 | 1465 | 0   |
| 60  | F  | T | 186 | 12 | Zion Train  | 9/26/2010  | 10/2/2011  | 371  | 40   | 0   |
| 61  | F  | F | 192 | 10 | Zion Train  | 9/26/2010  | 3/26/2015  | 1642 | 467  | 1   |
| 62  | F  | F | 156 | 8  | Zion Train  | 9/26/2010  | 12/15/2017 | 2637 | 805  | 527 |
| 63  | M  | T | 184 | 9  | Zion Train  | 9/26/2010  | 3/11/2013  | 897  | 56   | 0   |
| 64  | F  | F | 185 | 7  | Zion Train  | 9/26/2010  | 9/5/2013   | 1075 | 300  | 0   |
| 65  | M  | T | 127 | 6  | Zion Train  | 9/26/2010  | 11/18/2013 | 1149 | 795  | 0   |
| 82  | -- | U | 151 | 8  | Zion Train  | 12/12/2010 | 9/1/2013   | 994  | 900  | 0   |
| 83  | M  | M | 162 | 7  | Zion Train  | 12/12/2010 | 1/31/2013  | 781  | 211  | 0   |
| 89  | F  | F | 184 | 10 | Three Holes | 5/25/2011  | 4/2/2019   | 2869 | 1133 | 313 |
| 91  | -- | U | 166 | 7  | Three Holes | 5/25/2011  | 11/7/2013  | 897  | 472  | 0   |
| 417 | F  | F | 194 | 12 | Zion Train  | 9/15/2012  | 8/21/2017  | 1801 | 282  | 371 |
| 436 | F  | F | 174 | 8  | Zion Train  | 9/16/2012  | 9/24/2012  | 8    | 6    | 0   |
| 438 | F  | F | 168 | 9  | Zion Train  | 9/16/2012  | 11/12/2017 | 1883 | 136  | 114 |
| 439 | F  | F | 177 | 12 | Zion Train  | 9/16/2012  | 9/28/2019  | 2568 | 131  | 214 |

|     |    |    |     |    |             |           |            |      |     |     |
|-----|----|----|-----|----|-------------|-----------|------------|------|-----|-----|
| 440 | M  | M  | 162 | 11 | Zion Train  | 9/16/2012 | 10/10/2012 | 24   | 28  | 0   |
| 757 | -- | -- | --  | -- | Three Holes | 9/6/2013  | 5/5/2015   | 606  | 67  | 34  |
| 758 | -- | -- | --  | -- | Three Holes | 9/6/2013  | 5/2/2015   | 603  | 139 | 29  |
| 759 | -- | -- | --  | -- | Three Holes | 9/6/2013  | 6/24/2016  | 1022 | 105 | 188 |
| 760 | -- | -- | --  | -- | Three Holes | 9/6/2013  | 5/31/2015  | 632  | 415 | 143 |
| 761 | -- | -- | --  | -- | Three Holes | 9/6/2013  | 6/28/2020  | 2487 | 203 | 55  |

---

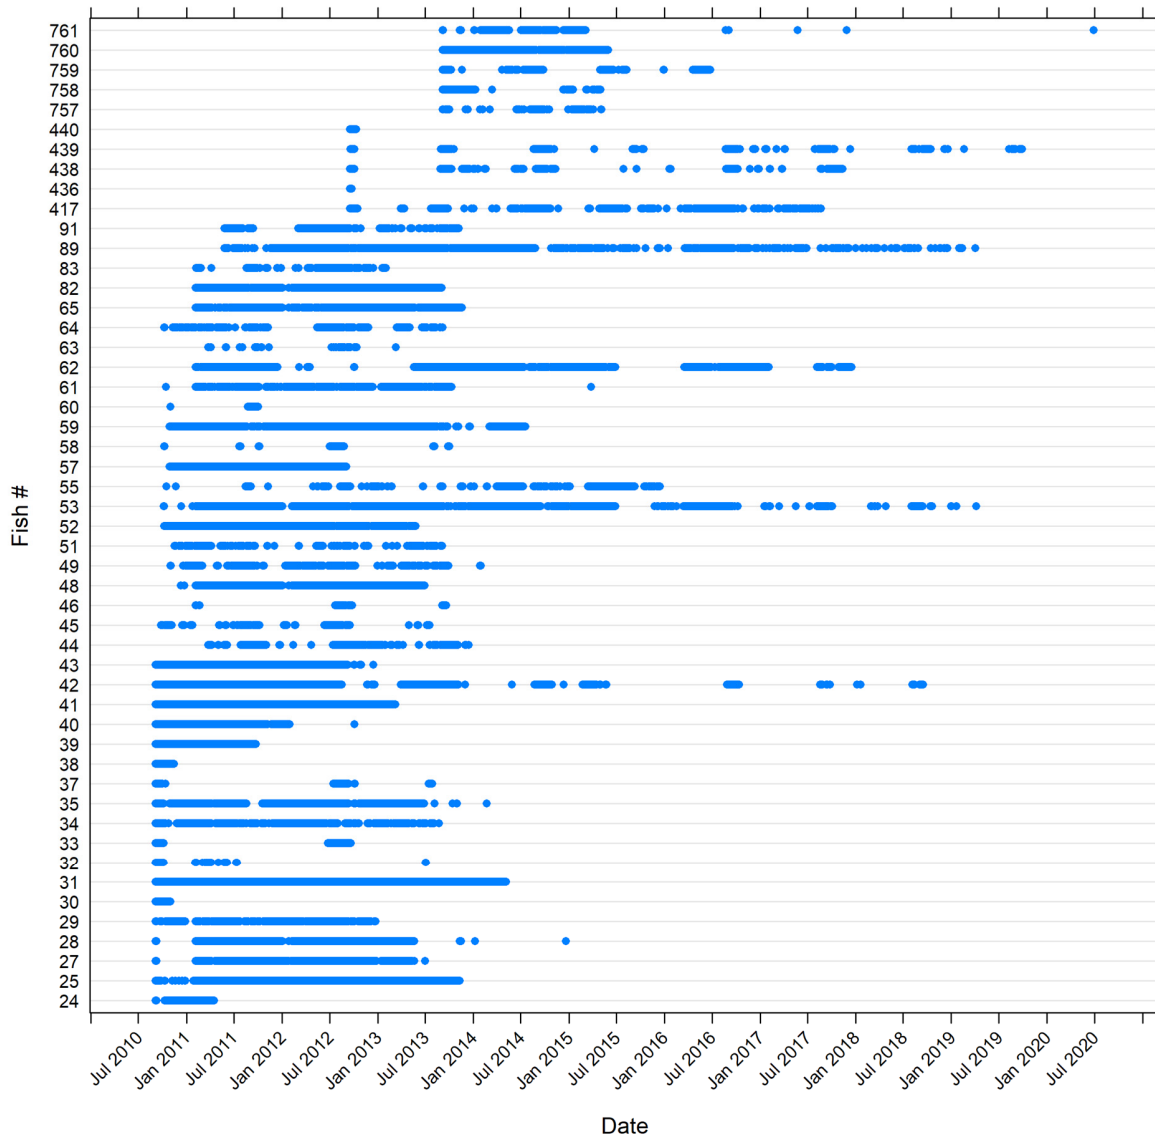

**Figure S1.** Detections of 50 tagged Atlantic goliath grouper (*Epinephelus itajara*) from the FACT Network array of receivers from mid-2010 through July 2020; each point represents a day with a validated detection for each individual.

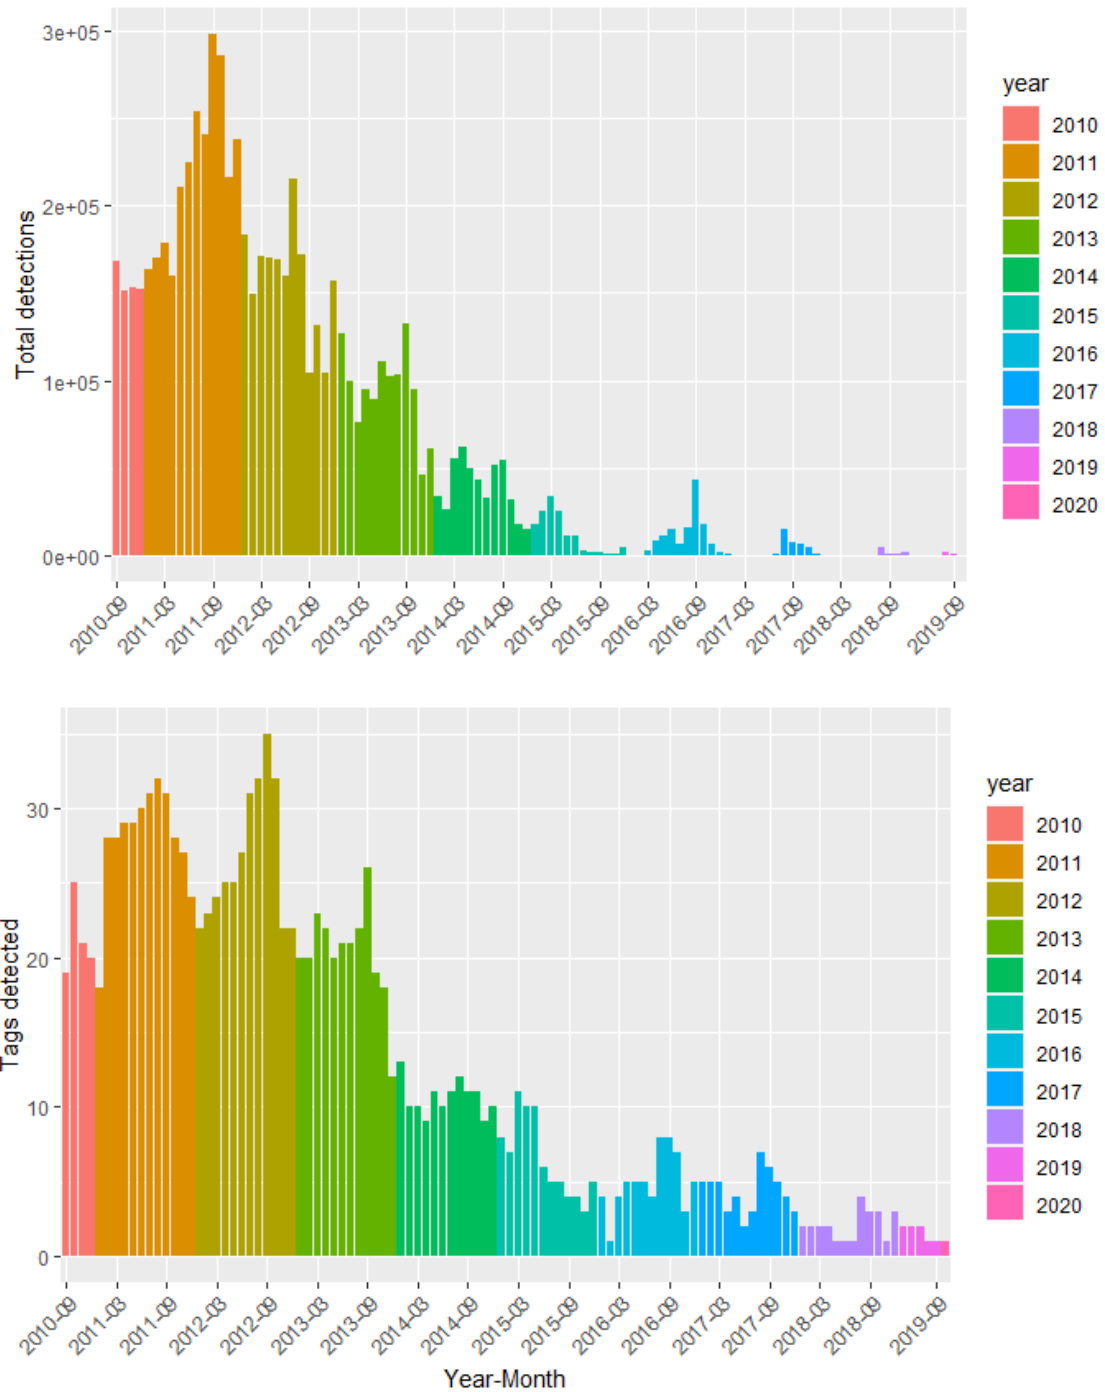

**Figure S2.** Detection results of Atlantic goliath grouper (*Epinephelus itajara*) detected by FACT Network monitored acoustic receivers deployed along the east coast of Florida from September 2010 – September 2019. **Top:** total detections per month, all tagged fish. **Bottom:** number of tagged fish detected per month.

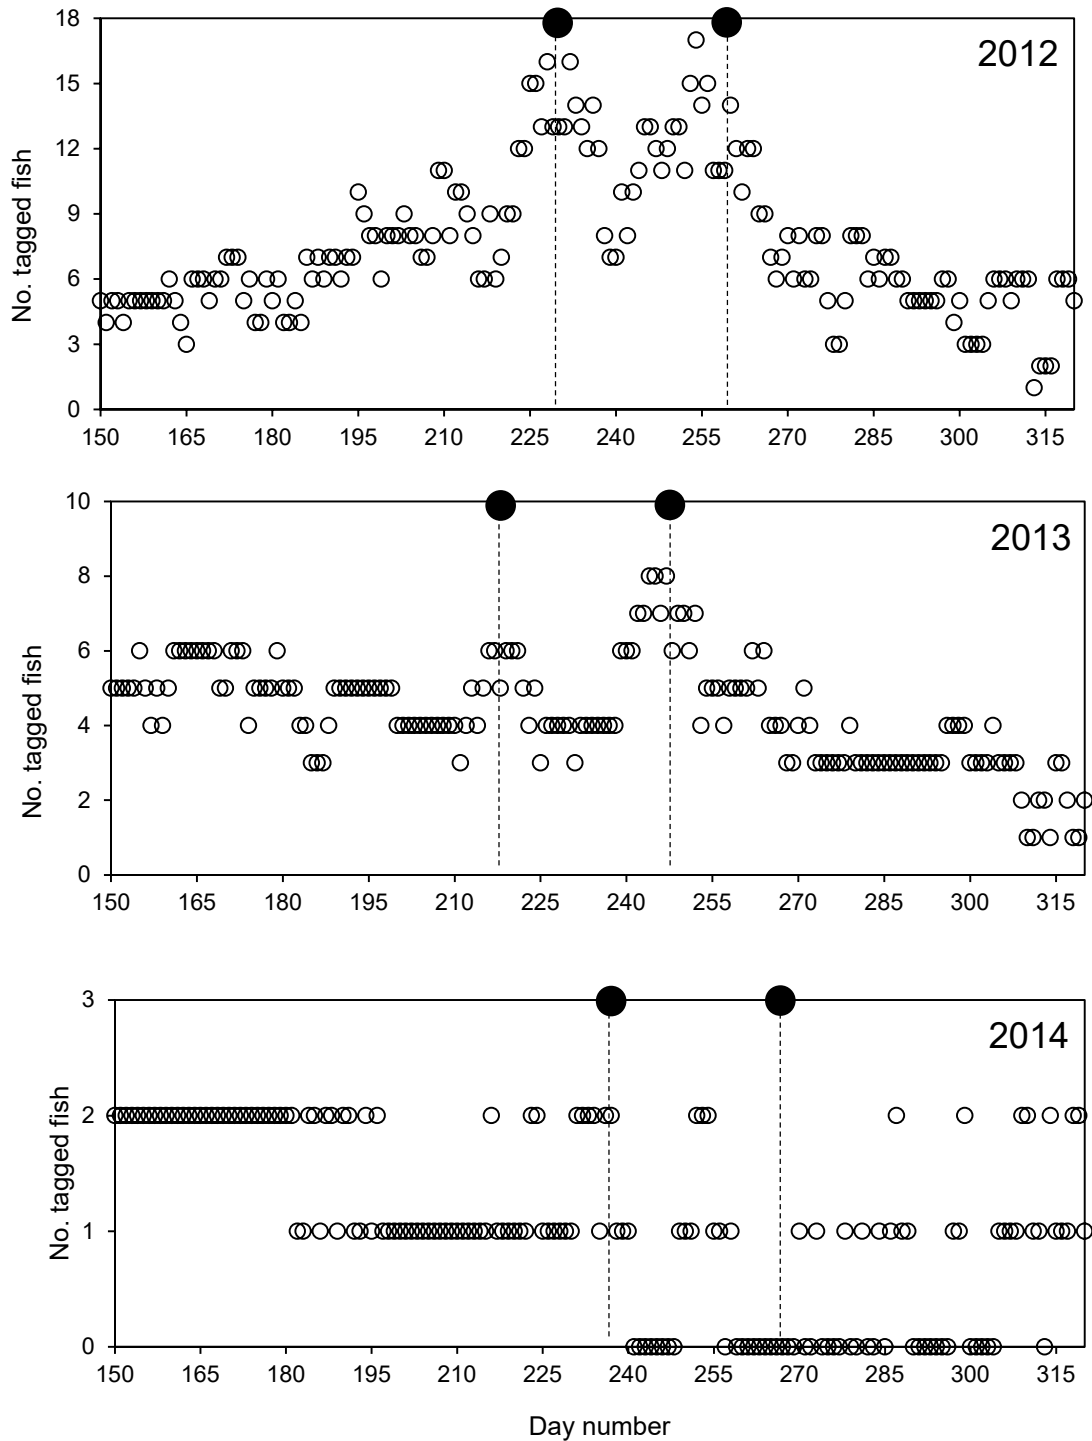

**Figure S3.** Number of tagged Atlantic goliath grouper (*Epinephelus itajara*) that were detected at the Zion Train (ZT) FSA site from late May to mid-November in 2012 (top), 2013 (middle), and 2014 (bottom). Vertical dashed lines indicate the approximate dates of the new moon for August and September each year. Note the change in scale of the y-axis between years.

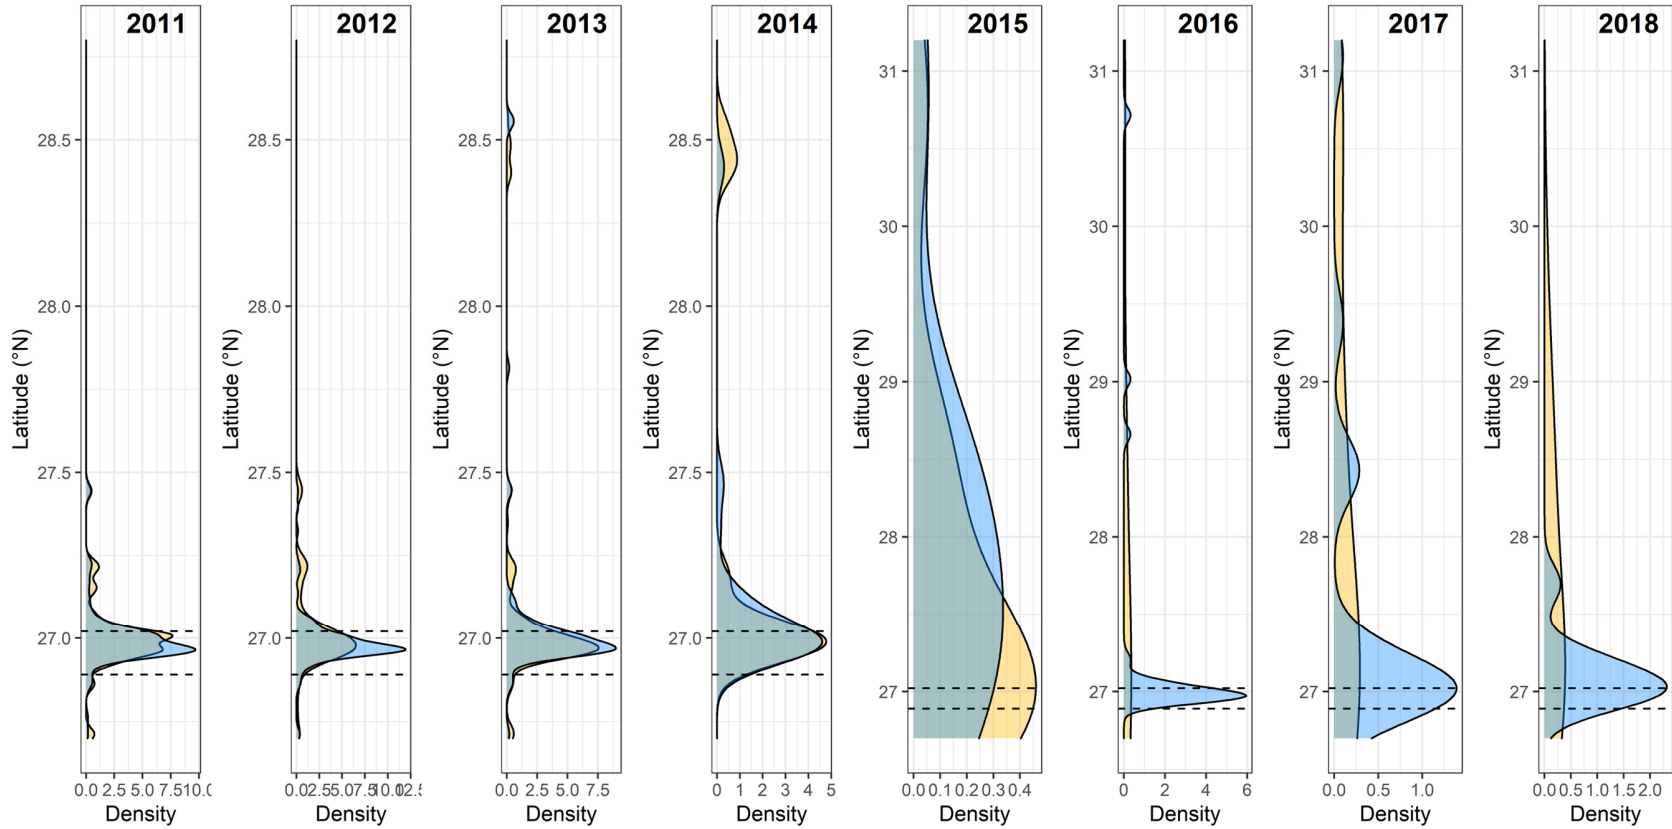

**Figure S4.** Annual kernel density plots of the likelihood of detecting a tagged Atlantic goliath grouper (*Epinephelus itajara*) at a given latitude during the spawning season (July to Oct, blue shaded region), versus non-spawning months (Nov to June, yellow shaded region), for 2011-2018.
